# Supplementary material
Source: HighWire-hosted journal article supplement (https://gh.bmj.com/content/7/1/e006845)

23cm

12cm

12cm

12cm

# HEALTH EFFECTS OF HEAT ILLNESS ON THE BODY

An increase in heat-related health problems is common during heat waves. Common symptoms of heat-related illnesses are:

-  Dehydration
-  Nausea
-  Fatigue
-  Confusion or anxiety
-  Exhaustion
-  Dizziness
-  Heavy sweating
-  Muscle cramps or aches
-  Faster and weaker pulse
-  loss of conscious or fainting

Heat-related illnesses are preventable and treatable, but can become fatal if symptoms are not addressed in a timely way. Heat stroke is a serious condition where the body temperature raises to dangerous levels, and it can lead to death.

# WHAT TO DO IN CASE OF EMERGENCY

-  Move the person to a cooler place
-  Remove excessive clothing
-  Immerse victim in a cool bath
-  Contact hospital in case of breathing problems
-  In case of vomiting or unconsciousness, do not give anything to eat or drink

**IN CASE OF AN EMERGENCY**  
**Aman Clinic**, Morirro Hall,  
Ibrahim Hyderi, Karachi

**Aman Telehealth**  
9123 or  
021-111-11-923  
for Heat Health Advice

**Aman Ambulance**  
**1021**  
for Medical  
Emergency Service

This project is funded by Elrha's Research for Health in Humanitarian Crises (R2HC) Programme, which is funded equally by the Wellcome Trust and DFID

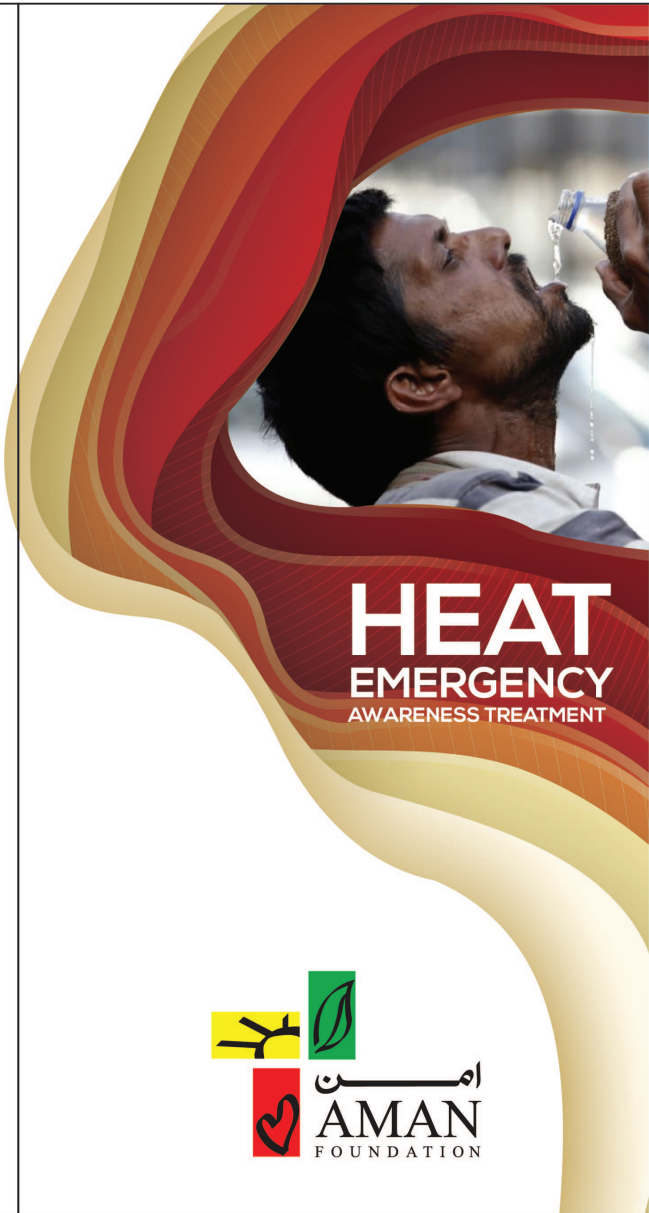

# HEAT EMERGENCY

AWARENESS TREATMENT



Supplement: inline-supplementary-material-2 [file inline-supplementary-material-2.pdf]
